1  
2  
3  
4  
5  
6  
7  
8  
9  
10  
11  
12  
13  
14  
15  
16  
17  
18  
19  
20  
21  
22  
23  
24

# High transgene expression is associated with systemic *GFP* silencing in *Nicotiana benthamiana*

Bill Hendrix<sup>1\*,#a</sup>, Paul Hoffer<sup>1,#b</sup>, Rick Sanders<sup>1</sup>, Steve Schwartz<sup>1,#c</sup>, Wei Zheng<sup>1,#d</sup>, Brian Eads<sup>2</sup>, Danielle Taylor<sup>2</sup>, and Jill Deikman<sup>1</sup>

<sup>1</sup>Bayer Crop Science, Woodland, California, United States of America

<sup>2</sup>Bayer Crop Science, Chesterfield Parkway, St. Louis, Missouri, United States of America

<sup>#a</sup>Current Address: Bayer Crop Science, West Sacramento, California, United States of America

<sup>#b</sup>Current Address: Governor’s Office of Emergency Services, Radiological Preparedness Unit  
Mather, California, United States of America

<sup>#c</sup>Current Address: InnerPlant, Davis, California, United States of America

<sup>#d</sup>Current Address: Hangzhou Huadi Group Co., Hangzhou, China.

25 \*Corresponding author

26 E-mail: [bill.hendrix@bayer.com](mailto:bill.hendrix@bayer.com)

27

28

## 29 **Abstract**

30 Gene silencing in plants using topical dsRNA is a new approach that has the potential to be a sustainable  
31 component of the agricultural production systems of the future. However, more research is needed to  
32 enable this technology as an economical and efficacious supplement to current crop protection practices.  
33 Systemic gene silencing is one key enabling aspect. The objective of this research was to  
34 better understand systemic transgene silencing in *Nicotiana benthamiana*. Previous reports details  
35 sequencing of the integration site of the *Green Fluorescent Protein (GFP)* transgene in the well-known *N.*  
36 *benthamiana* GFP16C event revealed inadvertent co-integration of part of a bacterial transposase. To  
37 determine the effect of this transgene configuration on systemic silencing, new *GFP* transgenic lines with  
38 or without the transposase sequences were produced. *GFP* expression levels in the 19 single-copy events  
39 and three hemizygous 16C lines produced for this study ranged from 50-72% of the homozygous 16C  
40 line. *GFP* expression was equivalent to 16C in a two-copy event. Local *GFP* silencing was observed in  
41 all transgenic and 16C hemizygous lines after topical application of delivery formulations with a *GFP*  
42 targeting dsRNA. The 16C-like systemic silencing phenotype was only observed in the two-copy line.  
43 The partial transposase had no impact on transgene expression level, local *GFP* silencing, small RNA  
44 abundance and distribution, or systemic *GFP* silencing in the transgenic lines. We conclude that high  
45 transgene expression level is a key enabler of systemic transgene silencing in *N. benthamiana*.

46

## 47 **Introduction**

48 RNA-based gene silencing is a sequence-specific, conserved mechanism in eukaryotes implicated in viral  
49 defense, control of transposable elements, and gene regulation. Gene silencing using transgenic dsRNA-  
50 based approaches has been utilized to deploy a number of agriculturally important traits including virus  
51 resistance in papaya (1), delayed fruit ripening in tomato (2), black-spot bruise resistance and lower  
52 acrylamide levels post-cooking in potato (3), improved oil composition in soybeans (4) and insect control

53 in corn (5). These commercial products and others like them all take advantage of DCL-like proteins that  
54 cleave various forms of dsRNA into small interfering RNAs (siRNAs) 21-24nt in length. These siRNAs  
55 are loaded into an Argonaute protein and, along with other factors, form an RNA induced silencing  
56 complex, or RISC (6). The RISC functions as a specific endonuclease that cleaves target transcripts  
57 identified by base pairing chemistry. Recently, methods have been developed to silence plant genes using  
58 topically delivered dsRNAs (7-11). The most efficacious versions of these methods deliver 21-24nt  
59 dsRNAs that initiate silencing without initial dicer processing to produce efficacious gene silencing  
60 effectors. Topical dsRNA technology has the potential to complement and/or replace many of the current  
61 crop protection practices that are vital for agricultural productivity, but further research is needed to  
62 realize the potential of this new technology in agricultural production settings. Systemic gene silencing is  
63 a key enabling aspect that needs more study. Systemic silencing of the *GFP* transgene of *N. benthamiana*  
64 line 16C has been reported using topical dsRNA delivery methods (7). This study is part of an effort to  
65 understand how topically-delivered 22nt dsRNAs targeting *GFP* leads to a systemic silencing response in  
66 *N. benthamiana*.

67  
68 *N. benthamiana* is model dicot that has been widely adopted by public and private sector researchers. This  
69 species is endemic to arid regions in Australia (12) and is noted for its virus susceptibility (13) and  
70 amenability to *Agrobacterium* infiltration (14). Given these attributes, *N. benthamiana* is commonly used  
71 in studies examining plant-virus interactions and in studies utilizing the virus-induced gene silencing  
72 (VIGS) technique. Transgenic lines expressing a *Green Fluorescent Protein (GFP)* gene from *Aequorea*  
73 *victoria* were produced to study the initiation and maintenance of VIGS in *N. benthamiana* (15). One of  
74 these transgenic lines, GFP16C, has since become a workhorse for research on many aspects of plant  
75 biology but most relevant to this report, local and systemic transgene silencing.

76  
77 Systemic silencing of the *GFP* transgene in *N. benthamiana* was first reported by Voinnet and Baulcombe  
78 (14). Local silencing was induced by *Agrobacterium* infiltration of a plasmid containing a T-DNA insert

79 expressing the *GFP* coding sequence. Visual evidence of systemic *GFP* silencing was observed after  
80 infiltration as “unmasking” of red chlorophyll fluorescence along major and minor veins in distal,  
81 expanding tissue. The authors found no evidence that the bacteria or the T-DNA had migrated from the  
82 infiltration site and concluded the silencing signal originated in the infiltrated leaf but did not attempt to  
83 identify the mobile signal. The silencing signal in *N. benthamiana* is phloem-mobile, follows source-sink  
84 relationships (16), and can be impacted by light intensity (17). In more recent work, researchers  
85 demonstrated that a DICER-LIKE2 (DCL2)-dependent mechanism is involved in the systemic spread of  
86 *GFP* silencing in *N. benthamiana* (18). Using a grafting approach, the authors showed that DCL2 was  
87 required in distal tissue to respond to mobile silencing signal but not required in the initiating tissue to  
88 produce the signal. In the same experiments, DCL3 and DCL4 were found to attenuate the systemic  
89 silencing response in *N. benthamiana*.

90  
91 Systemic silencing was also reported in tobacco (19). Silenced transgenic lines expressing nitrate  
92 reductase, nitrite reductase, or glucuronidase were used in a series of grafting experiments. The systemic  
93 silencing signal was transgene specific, unidirectional from stock to scion, and required a transcriptionally  
94 active transgene in the scion to propagate the silencing signal. Bidirectional systemic silencing has been  
95 reported in *N. benthamiana* (20, 21) and *Arabidopsis* (22). A number of factors could contribute to  
96 differences in the observed patterns of silencing—including the model plant, the type of silencing (post-  
97 transcriptional versus transcriptional), the grafting method, and the developmental stage of the plant  
98 material (23).

99  
100 Gene silencing can involve production of small RNAs for the targeted mRNA outside the dsRNA target  
101 region in both plant (24) and animal (25) systems. This phenomenon is referred to as transitivity. Small  
102 RNA transitivity is a feed-back loop that amplifies the initial silencing signal (26) and requires the action  
103 of an RNA-dependent RNA (RDR) polymerase. *RDR6* has been shown to be essential for transitive small  
104 RNA production in plants (27). When *GFP* transgenes were targeted for silencing using a VIGS vector

105 with a partial *GFP* coding sequence, abundant transitive small RNAs both 5' and 3' of the targeted  
106 sequence were observed in *N. benthamiana* and Arabidopsis (28).

107  
108 Transitivity is observed when targeting transgenes for silencing but reports of transitivity when targeting  
109 endogenous genes are mixed. Transitive small RNA production and systemic silencing for an  
110 endogenous gene, *Virp1*, and *GFP* were compared in *N. benthamiana* (29). Systemic silencing and  
111 bidirectional transitivity were observed when silencing the *GFP* transgene but not the endogenous *Virp1*  
112 gene. Further, a *GFP* transgene with an endogenous gene promoter and intron did not exhibit transitivity,  
113 coding region methylation, or systemic silencing, but these molecular and phenotypic hall marks were  
114 observed when the *GFP* gene was driven by the CaMV 35S promoter and lacked an intron (26).

115  
116 Another factor contributing to transitivity is the RNAi effector (trigger) that is used. Transitivity 3' of the  
117 target locus was observed using a 22nt amiRNA construct targeting chalcone synthase in Arabidopsis but  
118 not with a 21nt amiRNA construct (27). These data indicate the occurrence of transitivity after silencing  
119 an endogenous gene may depend on the type of dsRNA used to initiate the silencing. Indeed, we have  
120 observed dsRNA-length dependent transitivity targeting both a *GFP* transgene and endogenous genes in  
121 our laboratories using *N. benthamiana*, tomato, and *Amaranthus cruentus* (10). Production of transitive  
122 small RNAs may function to enhance local silencing and have been proposed to be essential for systemic  
123 silencing (23).

124  
125 The gene integration site in the *N. benthamiana* GFP16C line was studied in detail (30). A 3.2kb portion  
126 of a transposase gene from *Agrobacterium* was found co-integrated immediately adjacent to the *GFP*  
127 cassette. The authors suggested that the partial transposon may have an enhancing effect on the silencing  
128 response observed in the 16C line.

129

130 We conducted experiments in *N. benthamiana* to understand the impact of the partial transposase gene on  
131 local and systemic gene silencing and on transitive small RNA production after targeting the *GFP*  
132 transgene with a 22nt dsRNA delivered topically. We found that the partial transposase had no impact on  
133 local silencing, systemic silencing, transitive small RNA production, or level of *GFP* expression. Using  
134 F1 hybrids of the 16C line in addition to a diverse set of new transgenic *GFP N. benthamiana* lines, we  
135 provide evidence that high *GFP* expression levels appear to be a major contributing factor to the sensitive  
136 systemic silencing response observed using the topical dsRNA technique in the GFP16C line.

137

## 138 **Materials and methods**

### 139 **Plant growth conditions**

140 All *N. benthamiana* plants were germinated in 200-cell plug trays prefilled with coconut coir plugs (Jiffy  
141 Preforma Blend 10) in a growth chamber maintained at 25°C with 150  $\mu\text{mol m}^{-2}/\text{s}^{-1}$  light intensity and a  
142 16h day length. Relative humidity was not controlled and fluctuated according to irrigation frequency and  
143 plant density in the chambers at any given time. The seedlings were irrigated using an ebb and flow  
144 system 3 times per day with a dilute solution of 20-20-20 liquid fertilizer (Peters).

145

146 The seedlings were transplanted 9-10 days after seeding into 2.5in pots filled with Berger BM2 peat moss  
147 potting mixture. Transplants were grown with the same conditions described above except for irrigation  
148 frequency. Transplants were ebb-flow irrigated every other day for the first week and daily thereafter.

149

### 150 **Plant transformation**

151 The T-DNA inserts for each transformation construct were synthesized using a third-party vendor (Bio  
152 Basic) based on sequences published by Philips et al. (2017). The inserts (S2 Fig) were cloned into a

153 standard binary vector using *SpeI* and *NotI* restriction sites added during synthesis and sequence verified.  
154 *N. benthamiana* seedlings were transformed using *Agrobacterium tumefaciens* strain AB33 as described  
155 previously (31).  
156  
157 Regenerated shoots were transplanted as described above and sampled for *GFP* expression and copy  
158 number analysis using quantitative PCR. The single copy 16C line was used as a reference sample in  
159 these analyses. Seeds were harvested from the putative single-copy R0 lines. Forty R1 seeds per line  
160 were germinated in coir plugs and segregation of the *GFP* transgene was visually assessed to confirm the  
161 single copy designations made in the R0 generation. Putative homozygous seedlings were visually  
162 selected based on *GFP* fluorescence intensity. The selections were sampled for *GFP* copy number and  
163 expression analysis. Seeds were harvested from putative R1 homozygotes, and forty R2 seeds per line  
164 were grown to confirm the *GFP* locus was fixed in each line.

165

## 166 **DNA and RNA extraction and analysis**

167 Leaf tissue was collected using a 4mm round biopsy punch. Eight to ten samples per leaf were collected  
168 into 96-well plate preloaded with steel grinding balls. The plates were frozen prior to sampling and tissue  
169 was collected on dry ice. Total RNA was extracted from leaf tissue using Trizol reagent (ThermoFisher).  
170 1ml of Trizol was added to the frozen leaf discs. The plates were sealed, and the tissue was homogenized  
171 at 1600rpm for 10 min using a Genogrinder. The manufacturer's instructions were followed for the  
172 remainder of the procedure with exception of a 20 min centrifugation to precipitate total RNA. Glycol  
173 blue (45µg) was added to aid in pellet recovery. The RNA was resuspended in 20µl of RNase free water,  
174 and the concentration was measured using Quant-iT RNA BR assay kit (ThermoFisher). For qPCR  
175 analysis, the samples were diluted to 5ng/µl and target gene expression was measured as described in  
176 Schwartz et al. (2019).

177



178 DNA was extracted using Plant DNAzol (ThermoFisher) following the manufacturer's instructions. The  
179 purified DNA was resuspended in water and the concentration was measured using UV spectroscopy. The  
180 samples were diluted to 50 ng/μl and *GFP* copy number was estimated using qPCR. The qPCR reaction  
181 mixtures comprised DNA (100ng total), and the reactions were assembled as referenced for the  
182 expression analysis. Probes sets for NPTII and *GFP* coding region were utilized to estimate copy number  
183 relative to the 18S rRNA gene. The sequences for the all the primer and probes sets are provided in  
184 supplemental section (S3 Fig).

185

## 186 **Topical dsRNA delivery**

187 Topical dsRNA delivery was performed using carbon dots produced in-house as described (11). Briefly,  
188 the chemically synthesized dsRNAs were complexed to carbon dots overnight at room temperature in a  
189 solution containing 40 mM glycerol, 10 mM MES pH 5.7 and 12 μg/ml dsRNA. The dsRNA solution was  
190 added to solution of the same composition containing carbon dots. A carbon dot/ RNA ratio of 40-50 was  
191 utilized for all experiments. Prior to spray application the superspreading surfactant Silwet S279 was  
192 added to the CD:dsRNA complexes at a final concentration of 0.4% (v/v). The solution was applied to the  
193 leaf surfaces using an Iwata HP-M1 handheld airbrush sprayer. Approximately 60 μl of solution was  
194 applied to all leaves of each plant, in most cases a 3-4-leaf transgenic seedling. Whole plant images were  
195 collected 4-6 days after dsRNA to qualitatively assess *GFP* silencing. Plants were harvested and imaged  
196 for local and systemic *GFP* silencing 14 days after dsRNA application.

197

## 198 **Image capture and analysis**

199 Leaves were harvested and placed on a black matte plastic imaging board. The leaves were photographed  
200 using an imaging station equipped with a Cannon EOS 70D camera with Canon lens (EFS 18-55mm lens,  
201 a low intensity white LED light source (EarthLED DirectLED™ 30271), and a high intensity LED royal  
202 blue light source (447 nm) model SL3500-D LED light panels with proprietary filters (Photon System

203 Instruments). Images were acquired using the Canon EOS utility 2 software with tethered image  
204 acquisition. For *GFP* images, 58mm Tiffen Green 11 and Yellow 12 filters were utilized to capture *GFP*  
205 and chlorophyll fluorescence from ~480nm to ~600nm.

206  
207 The images were processed using ImageJ with the software provider's guidance. Briefly, the program  
208 operator utilized the threshold color panel to highlight a border around each leaf. A border image was  
209 overlaid onto the leaf image and the pixel number within the leaf border was quantitated by the software.  
210 The quantitated number of pixels represented the total leaf area. A similar thresholding process was used  
211 to highlight a border around the visible leaf phenotype and to quantitate pixels within the phenotypic area.  
212 *GFP* and *CHL-H* silenced areas were calculated by dividing the phenotypic area pixels by the total leaf  
213 area pixels.

214

## 215 **Small RNA library construction, sequencing, and analysis**

216 Small RNA libraries were prepared using Illumina's TruSeq small RNA Library Preparation Kit  
217 according to the manufacturer's protocol (Document # 15004197v02) with modifications at the amplified  
218 cDNA gel purification step. Individual libraries with unique indexes were normalized by concentration  
219 and pooled by volume before gel purification. Pooled libraries were size separated with a 6% Novex TBE  
220 PAGE Gel and stained with 1X SYBR Gold for 20 minutes instead of ethidium bromide. Size selected  
221 libraries were sequenced using Illumina's NextSeq platform to a minimum depth of 3 million reads per  
222 sample.

223 Library quality was assessed using fastqc (Andrews, 2010) and Trimmomatic with read-quality filtering  
224 was used for trimming adapters (32). For read mapping, processing and analysis, SAMtools (33),  
225 BAMtools (34), bowtie2 (35) and custom scripts (R and bash) were used. Counts of raw reads were  
226 normalized to the total number of reads passing length (18-48 nt) and quality criteria (5 base sliding  
227 window with average quality above 20).

## 228 **Statistical analysis**

229 All data were analyzed using JMP Version 12 (SAS Institute Inc., Cary, NC).

230

## 231 **Results**

### 232 **Generation and characterization of transgenic plants containing a *GFP***

#### 233 **transgene with or without the 16C partial transposase element**

234 To investigate the impact of the partial transposase sequence on systemic silencing in the 16C line, we  
235 synthesized T-DNA inserts containing either the full T-DNA sequence reported for the 16C line (30) or  
236 the same T-DNA sequence without the partial transposon. The T-DNAs were cloned into binary vectors  
237 and the cassette sequence was confirmed. pMON417669 comprised the insert including the selectable  
238 marker, the *GFP* expression cassette, and the partial transposase. pMON417670 comprised the same  
239 sequence without the partial transposase sequence (Fig 1A). Transgenic *N. benthamiana* plants were  
240 created with each construct. Ten single-copy events were selected in the R0 generation using qPCR to  
241 estimate copy number relative to the single-copy 16C line (15). Copy number was confirmed in the R1  
242 generation using transgene segregation and an additional round of qPCR copy number quantification. All  
243 events were confirmed as single copy in the R1 generation except event NT\_W22241804 (pMON417670)  
244 which was an unlinked, two-copy event.

245

246 **Fig 1. *GFP* expression in 16C and homozygous transgenic lines with and without transposase.** Two

247 binary vectors were constructed with T-DNA inserts comprising the 16C integration locus sequence  
248 described previously (30) (A) pMON417669 included a NPTII selectable maker, 35S:*GFP* expression  
249 cassette, and the partial transposase. pMON417670 included the same sequence without the partial  
250 transposase. (B). *GFP* expression for 16C and 20 transgenic events produced for this study. Tissue was  
251 collected from the first two true leaves were untreated seedling. The data presented are from homozygous

252 R2 lines. The experiment was arranged as a randomized complete block with four replications per event.

253 *GFP* expression values are calculated relative to the PP2a gene. The data are expressed as means +/-  
254 standard error.

255

256 *Green fluorescent protein (GFP)* expression was measured in leaves of four homozygous plants per event  
257 using qPCR in the R2 generation. *GFP* expression values ranged from 51-72% of the 16C line in single  
258 copy events (Fig 1B). The two-copy NT\_W22241804 event had *GFP* expression equivalent to the 16C  
259 line. The same plants sampled for expression were utilized in the first repetition of the systemic silencing  
260 screening experiment.

261

## 262 **Topical dsRNA delivery and target gene silencing in transgenic *GFP***

### 263 **events**

264 Short interfering RNAs 22nt in length were chemically synthesized and used to target the *GFP* and  
265 *magnesium chelatase subunit H (CHL-H)* genes in the 16C line (sequences, Fig 2S). Carbon dot  
266 formulations were used to topically deliver these dsRNAs or a scrambled control sequence to 16C  
267 seedlings (11). Application leaves from the plants were removed and photographed 6 days after dsRNA  
268 application (Fig 2). Visual indications of gene silencing were evident for *GFP* and *CHL-H*. *GFP*  
269 silencing appeared as red chlorophyll fluorescence on application leaves against the green fluorescent  
270 background when the leaves were excited with a blue light source (Fig 2A top). *CHL-H* silencing  
271 appeared as yellow sectors on the application leaves (Fig 2B top). Tissue was collected from phenotypic  
272 areas to measure gene expression and small RNA abundance. Reduced mRNA levels were observed for  
273 both *GFP* (Fig 2A middle) and *CHL-H* (Fig 2B middle) when those genes were targeted by a specific  
274 dsRNA. Transitive small RNAs were observed both 5' and 3' of the target region for the *GFP* gene (Fig  
275 2A bottom), but only 3' of the target region for *CHL-H* gene (Fig 2B bottom). The transitive small RNAs

276 were predominantly 21nt in length but other biologically important size classes (e.g. 22nt and 24nt) were  
277 also observed (Fig 2 inset bottom).

278

279 **Fig 2. Topical dsRNA delivery using carbon dots.** Short dsRNAs 22nt in length were delivered  
280 topically to *N. benthamiana* using carbon dot technology. The *GFP* transgene and the *magnesium*  
281 *chelata* subunit *H* (*CHL-H*) were targeted in the 16C line. Application leaves were harvested 6 days  
282 after dsRNA treatment. Visual phenotypes were observed for *GFP* (A, top) and *CHL-H* (B, top). Target  
283 gene expression and small RNA production were measured in tissue collected from phenotypic leaf  
284 sectors and non-phenotypic control tissues. *GFP* (A, middle) and *CHL-H* (B, middle) expression was  
285 reduced 48 and 72%, respectively. Abundant transitive small RNAs were observed both 5' and 3' of the  
286 target region for *GFP* (A, bottom). Transitive small RNAs were only observed 3' of the target region for  
287 *CHL-H* (B, bottom). The experiment was arranged as a randomized complete block with 4 replications of  
288 each treatment. The expression data are expressed as means +/- standard error. The replicates for each  
289 treatment were pooled prior to small RNA sequencing. The sequencing data are expressed as the sum of  
290 normalized small RNA counts per  $1 \times 10^6$  reads for RNAs 19-25nt in length.

291

292 The *GFP* transgene was silenced in the 16C line and the 20 transgenic events produced for this study  
293 using carbon dot delivery of a chemically synthesized 22nt dsRNA targeting the *GFP* transgene. Whole  
294 plants were photographed 4 days after dsRNA application to qualitatively assess local *GFP* silencing (Fig  
295 3A top). The plants were harvested by removing all the leaves 14 days after dsRNA application. The  
296 leaves were arranged in developmental order and photographed under blue light (Fig 3A bottom). These  
297 images were analyzed for local *GFP* silencing on the application leaf (Fig 3B top) and for systemic  
298 silencing on younger leaves (Fig 3B bottom). Systemic *GFP* silencing covering 25% and 12% of the  
299 total leaf area was observed in the 16C and NT\_W22241804 lines, respectively. Weak systemic *GFP*  
300 silencing was observed in many of the other events, but the silenced area was low, and did not continue to

301 spread into new tissue like in the 16C line. In most instances, the systemic silencing in these events was  
302 visually evident in only 1 or 2 leaves, many times appearing in single or a few veins. No difference was  
303 observed in the extent or frequency of systemic silencing comparing the events containing the partial  
304 transposase and the events without the partial transposase. The experiment was conducted three times  
305 with similar results. The data from the experiment with highest local *GFP* silencing is shown.

306

307 **Fig 3. Local and systemic *GFP* silencing in 16C and homozygous transgenic lines with and without**  
308 **transposase.** A 22nt dsRNA targeting *GFP* was topically delivered to transgenic R2 *N. benthamiana*  
309 seedlings homozygous for the *GFP* locus using carbon dots. Intact plants were photographed at 4 d after  
310 dsRNA treatment to qualitatively assess *GFP* silencing (A, top). The plants were destructively harvested  
311 14 d after dsRNA treatment. All leaves were removed, arrayed in developmental order, and photographed  
312 (A, bottom). Application leaf identities are denoted by the colored arrows. Local (B, top) and systemic (B,  
313 bottom) *GFP* silenced area was measured using ImageJ. Developmental abnormalities and extreme  
314 stunting were observed for event NT\_W22241807. Systemic *GFP* silencing covering 25% and 12% of  
315 the total leaf area was observed for the 16C line and the two-copy NT\_W22214804 event, respectively.  
316 Low levels of systemic *GFP* silencing were observed in the remaining events. The partial transposase had  
317 no impact on local or systemic *GFP* silencing (inset) 14 days after dsRNA treatment. The experiment was  
318 conducted 1 time in the R1 generation and 2 times in the R2 generation. Each repetition was arranged as  
319 a randomized complete block with 4 replications per treatment. The phenotypic data are means for 4  
320 replicates +/- standard error from the experiment with the greatest local *GFP* phenotypes and levels of  
321 systemic *GFP* silencing.

322

### 323 **Silencing in hemizygous 16C lines**

324 Given our inability to reproduce the high expression levels observed in the 16C line or 16C-like systemic  
325 silencing in any single-copy transgenic line, we wanted to better understand the role of *GFP* expression

326 levels in systemic transgene silencing. To do this, we examined the systemic silencing response in three  
327 F1 lines hemizygous for the 16C event. Each line originated from an independent cross of the 16C line as  
328 a male parent and three different wildtype *N. benthamiana* plants as the female parents. As expected *GFP*  
329 expression was reduced by approximately half in the hemizygous F1 lines (Fig 4B inset). Local *GFP*  
330 silencing was induced using carbon-dot delivery of a 22nt dsRNA targeting *GFP* with a single application  
331 of the formulation or two applications of the formulation 4 days apart. The plants were harvested,  
332 photographed and sampled for small RNA sequencing. 16C-like systemic *GFP* silencing was not  
333 observed in any of the hemizygous 16C lines (Fig 4A). Minor vein silencing was observed in 1 or 2  
334 leaves in some of the hemizygous plants. In these cases, the observed *GFP* systemic silenced area was  
335 reduced more than 100-fold in the best performing hemizygous line relative to the 16C homozygous  
336 control (Fig 4B).

337

338 **Fig 4. Local and systemic silencing in 16C hemizygous lines.** The systemic *GFP* silencing response  
339 was evaluated in three 16C hemizygous lines. The seedlings were topically treated with one or two  
340 applications of dsRNA/carbon dots solution. The plants were harvested 14 d after dsRNA treatment. All  
341 leaves were removed, arrayed in developmental order, and photographed. The white arrows denote the  
342 application leaves. (A) *GFP* expression was measured using qPCR. *GFP* was reduced by approximately  
343 half in the hemizygous lines relative to 16C (B, inset). *GFP* silencing in the application and systemic  
344 leaves was measured using Image J. *GFP* silencing was observed in application leaves for all treated  
345 plants. However, the silenced area was significantly reduced in the hemizygous lines relative to the 16C  
346 homozygous control (B, top). Systemic *GFP* silencing was observed in the 16C homozygous line  
347 covering 7.5 and 27.2% of the total leaf area in the single and double application treatments, respectively  
348 (B, bottom). The levels of systemic silencing in the hemizygous plants were low and not significantly  
349 different from the untreated 16C control. The experiment was arranged as a randomized complete block  
350 with 4 replications per treatment. The data are means +/- standard error. Letters indicate statistical  
351 difference using Student's t-test ( $\alpha=0.05$ ).

352

## 353 **Transitive small RNA production across transgenic and hemizygous** 354 **16C lines after *GFP* silencing**

355 Small RNA profiles were generated for application and systemic leaves from tissue collected 14 days  
356 after dsRNA application for all the lines in the systemic silencing screen. For application leaves, tissue  
357 was collected from sectors with a visible *GFP* silencing phenotype. For systemic leaves, tissue was  
358 collected from phenotypic areas where possible. In the absence of a visible systemic silencing phenotype,  
359 tissue was collected from the midrib and surrounding tissue from an expanding leaf 2-3 leaves away from  
360 the apex of the plant. Abundant transitive small RNAs targeting the coding region of the *GFP* gene were  
361 observed in application leaves in the 16C line (Fig 5A). These small RNAs were distributed both 5' and  
362 3' of the targeted region of the *GFP* gene (Fig 5B) and well above the background small RNA levels  
363 observed in untreated tissue for all events (S1 Fig). Similarly, both 5' and 3' transitive small RNAs were  
364 observed in application leaves for all the transgenic events generated for this study and in the 16C  
365 hemizygous lines. The transitive small RNAs in the application leaves were, on average, 10-fold less  
366 abundant in the events created for this study relative to the 16C line (Fig 5A). Somewhat higher levels of  
367 transitive small RNAs were observed in the application leaves of the hemizygous lines. The F1-7 had 3'  
368 transitive small RNA quantities approximately equal to the counts observed for the homozygous 16C line.  
369

### 370 **Fig 5. Transitive small RNA production 14 d after dsRNA application in local and systemic tissues.**

371 The small RNAs from phenotypic application and systemic leaves sampled 14 days after dsRNA  
372 application were sequenced and mapped to the coding sequence of the *GFP* transgene. Transitive small  
373 RNAs were observed both 5' and 3' of the target region for all application leaf samples evaluated (A).  
374 Substantial variation spanning two orders of magnitude was observed for the total number of small RNAs  
375 mapped in these samples. In systemic tissue, 5' and 3' transitive small RNAs were observed for the 16C  
376 and NT\_W22241804 line. Consistent with the visual phenotypic difference (Fig 3), the 16C line had 10-



377 fold more total small RNAs than observed in the NT\_W22241804 line. The other systemic samples had  
378 small RNAs at or near background levels (S1 Fig). The transitive small RNAs were distributed across the  
379 entire length of the *GFP* transgene and were predominantly 21nt in length (B). A weak correlation  
380 ( $R^2=0.33$ ) was observed between application leaf transitive small RNAs and systemic leaf transitive small  
381 RNAs (C). The replicates for each treatment were pooled prior to small RNA sequencing. The sequencing  
382 data are expressed as the sum of small RNA counts 19-25nt in length per  $1 \times 10^6$  total small RNA reads.

383  
384 Small RNAs mapping to the *GFP* transgene were observed in the systemic leaves of all events. Generally,  
385 the abundance was low and near background for most lines (S1 Fig). Abundant systemic small RNAs  
386 were observed for both 16C and the two-copy NT\_W22241804 lines. Similar to application leaves, the  
387 systemic small RNA abundance in the 16C line was up to 2 orders of magnitude higher than observed for  
388 any comparator line. The 21nt transitive small RNAs were the most abundant small RNA size class in  
389 both application and systemic leaves (Fig 5B inset). Total small RNA counts in application leaves were  
390 weakly correlated to small RNA counts in systemic leaves (Fig 5C).

391

## 392 **Discussion**

393 The *N. benthamiana* *GFP* reporter line 16C has been used extensively to study plant-virus interactions,  
394 transgene silencing and many other areas of plant biology. In our early topical gene silencing experiments  
395 using the 16C line, we observed local *GFP* silencing and in many cases systemic *GFP* silencing 7-14  
396 days after topical dsRNA application. With further study, we learned that the systemic *GFP* silencing in  
397 16C could be specifically initiated using 22nt dsRNA (7) (10) and that topical delivery of dsRNA  
398 targeting *GFP* in the 16C line initiated an amplification process that is characterized by production of  
399 transitive small RNAs both 5' and 3' of region targeted with dsRNA, especially when using a 22nt  
400 dsRNA (10). We adapted the topical dsRNA technology to several other dicot species targeting both  
401 endogenous genes and transgenes. However, we were unable to identify another genetic system in which

402 we observed systemic gene silencing after topical dsRNA application(11, 36). Further, the observation of  
403 abundant transitive small RNAs 5' of region targeted was not replicated in most transgenes and all  
404 endogenous gene targets that we were able to silence using a topical dsRNA technique.

405  
406 A partial transposase sequence was integrated immediately adjacent to the *GFP* expression cassette in the  
407 16C line (30). Since transposable elements are known targets of gene silencing pathways in plants(37, 38)  
408 it seemed possible that the proximity of such a transposase sequence to the *GFP* transgene could affect  
409 silencing activity at that locus, we completed experiments to test if the partial transposase sequence in the  
410 16C line facilitated and/or enhanced systemic transgene silencing. We utilized the published sequence to  
411 synthesize T-DNA inserts containing the same expression elements, including repeated elements such as  
412 the NOS terminator, and any deviation from the originally published 16C T-DNA sequence with and  
413 without the partial transposase sequence (Fig 1 and 2s). We did not observe any enhancing effect on  
414 systemic silencing as a result of including the transposase sequence in the transformation constructs (Fig  
415 3). We also didn't observe any effect on the level of expression of the *GFP* transgene (Fig 1).

416  
417 We observed both 5' and 3' transitivity for the *GFP* transgene after topical application of targeting 22 bp  
418 dsRNAs but have only seen significant 3' transitivity for endogenous genes studied ((10), and we  
419 considered that 5' transitivity could be unique to the 16C event and perhaps associated with systemic  
420 silencing. We were able to replicate the 5' transitivity phenomenon for the *GFP* transgene in all of the  
421 transgenic events produced for this study (Fig 5). However, 5' transitivity was not predictive of systemic  
422 silencing in these lines.

423  
424 High expression level and, to a lesser extent, small RNA abundance in application leaves were the only  
425 molecular parameters associated with systemic silencing in the new transgenic events. We achieved *GFP*  
426 expression equivalent to the 16C line in a two-copy pMON417670 event. The integration loci were not  
427 linked based on segregation data, but the locus arrangement and any spurious integrations in this line

428 were not investigated. Given this uncertainty, we also used F1 hybrid lines of 16C crossed with wildtype  
429 *N. benthamiana* to ascertain if systemic silencing was observed when expression from the 16C locus was  
430 reduced, in these cases by roughly half. Systemic silencing initiated with topical dsRNA was minimal in  
431 these hybrid lines. These data taken together suggest high expression is a key feature that enables the  
432 robust systemic silencing in the 16C line. However, given the equivalent *GFP* expression and somewhat  
433 attenuated systemic silencing response in the two-copy line NT\_W22241804, other factors may  
434 contribute to the more robust systemic response in the 16C line.

435

436 Our data provide support to the tiered threshold model explaining spontaneous *GFP* silencing in *N.*  
437 *benthamiana* proposed previously (39). In this model, the authors propose that cellular dsRNA and  
438 mRNA levels are both involved in progression from an initial silencing event (transcript cleavage) to  
439 local silencing and then on to systemic silencing. Our results suggest mRNA expression level is more  
440 impactful than local dsRNA levels. Local *GFP* silenced area was increased 4-6x (Fig 4) when using two  
441 dsRNA applications in the experiments examining systemic silencing in the 16C hemizygous lines. We  
442 did observe a small increase in systemic silencing in the hemizygous lines, but the levels did not approach  
443 the increase in systemic silencing observed in the 16C line when using two dsRNA applications. Further,  
444 transitive small RNA counts from phenotypic application leaves were only weakly correlated to transitive  
445 small RNA counts in the systemic tissue, explaining only 33% of the variation in the systemic samples  
446 (Fig 5C). These results taken together suggest that increasing the initial silencing “burst” alone is not  
447 sufficient to induce 16C-like systemic silencing in transgenic lines with *GFP* expression that is 28-50%  
448 lower than 16C. The formation of aberrant RNAs as a result of high transgene gene expression (40) may  
449 be another factor contributing to systemic silencing in 16C and the two-copy line, but further study is  
450 needed to understand the role aberrant transcripts may play in systemic silencing in these lines.

451

452 The formation of aberrant RNAs as a result of high transgene gene expression (40) may be another factor  
453 contributing to systemic silencing in 16C and the two-copy line, but further study is needed to understand  
454 the role aberrant transcripts may play in systemic silencing in these lines.

455

456 We investigated the systemic *GFP* silencing response in the widely used *N. benthamiana* transgenic line,  
457 16C. We were unable to replicate the systemic response in a single copy line, but we were able to rule out  
458 the co-integrated bacterial transposase as an enabling genetic component when initiating silencing using  
459 the topical dsRNA technology developed at Bayer. Further, transitive small RNA production 5' of the  
460 *GFP* target region was not predictive or enabling of systemic transgene silencing. We conclude high  
461 transgene expression level is an important enabling factor for self-sustaining, systemic gene silencing.

462

## 463 **Acknowledgments**

464 We thank Professor David Baulcombe for sharing the *N. benthamiana* 16C GFP line. We thank Jim  
465 Byrne, Brenda Reed, and Kaylene Yandell for their assistance in growing and maintaining the plants used  
466 in this study. We thank Ericka Havecker for discussions and helpful feedback on these studies.

467

## 468 **References**

- 469 1. Gonsalves D. Control of papaya ringspot virus in papaya: a case study. *Annual review of*  
470 *phytopathology*. 1998;36:415-37.
- 471 2. Kramer MG, Redenbaugh K. Commercialization of a tomato with an antisense polygalacturonase  
472 gene: The FLAVR SAVR™ tomato story. *Euphytica*. 1994;79(3):293-7.
- 473 3. Halterman D, Guenther J, Collinge S, Butler N, Douches D. Biotech Potatoes in the 21st Century:  
474 20 Years Since the First Biotech Potato. *American Journal of Potato Research*. 2016;93(1):1-20.
- 475 4. Wagner N, Mroczka A, Roberts PD, Schreckengost W, Voelker T. RNAi trigger fragment truncation  
476 attenuates soybean FAD2-1 transcript suppression and yields intermediate oil phenotypes. *Plant*  
477 *biotechnology journal*. 2011;9(7):723-8.
- 478 5. Siegfried BD, Vaughn TT, Spencer T. Baseline susceptibility of western corn rootworm (Coleoptera:  
479 Crysomelidae) to Cry3Bb1 *Bacillus thuringiensis* toxin. *Journal of economic entomology*.  
480 2005;98(4):1320-4.
- 481 6. Pyott DE, Molnar A. Going mobile: non-cell-autonomous small RNAs shape the genetic landscape of  
482 plants. *Plant biotechnology journal*. 2015;13(3):306-18.
- 483 7. Dalakouras A, Wassenegger M, McMillan JN, Cardoza V, Maegele I, Dadami E, et al. Induction of  
484 Silencing in Plants by High-Pressure Spraying of In vitro-Synthesized Small RNAs. *Frontiers in plant*  
485 *science*. 2016;7:1327.
- 486 8. Zhang H, Demirer GS, Zhang H, Ye T, Goh NS, Aditham AJ, et al. DNA nanostructures coordinate gene  
487 silencing in mature plants. 2019;116(15):7543-8.
- 488 9. Demirer G, Zhang H, Goh N, Chang R, Landry M. Nanotubes Effectively Deliver siRNA to Intact Plant  
489 Cells and Protect siRNA Against Nuclease Degradation 2019.
- 490 10. Hendrix B, Zheng W, Bauer MJ, Havecker ER, Mai JT, Hoffer PH, et al. Topically delivered 22 nt  
491 siRNAs enhance RNAi silencing of endogenous genes in two species. *bioRxiv*.  
492 2020:2020.04.20.052076.
- 493 11. Schwartz SH, Hendrix B, Hoffer P, Sanders RA, Zheng W. Carbon Dots for Efficient Small Interfering  
494 RNA Delivery and Gene Silencing in Plants. *Plant physiology*. 2020;184(2):647-57.
- 495 12. Bally J, Jung H, Mortimer C, Naim F, Philips JG, Hellens R, et al. The Rise and Rise of *Nicotiana*  
496 *benthamiana*: A Plant for All Reasons. *Annual review of phytopathology*. 2018;56:405-26.
- 497 13. Yang SJ, Carter SA, Cole AB, Cheng NH, Nelson RS. A natural variant of a host RNA-dependent RNA  
498 polymerase is associated with increased susceptibility to viruses by *Nicotiana benthamiana*.  
499 *Proceedings of the National Academy of Sciences of the United States of America*.  
500 2004;101(16):6297-302.
- 501 14. Voinnet O, Baulcombe DC. Systemic signalling in gene silencing. *Nature*. 1997;389(6651):553.
- 502 15. Ruiz MT, Voinnet O, Baulcombe DC. Initiation and maintenance of virus-induced gene silencing. *The*  
503 *Plant cell*. 1998;10(6):937-46.
- 504 16. Tournier B, Tabler M, Kalantidis K. Phloem flow strongly influences the systemic spread of silencing  
505 in GFP *Nicotiana benthamiana* plants. *The Plant journal : for cell and molecular biology*.  
506 2006;47(3):383-94.
- 507 17. Kotakis C, Vrettos N, Kotsis D, Tsagris M, Kotzabasis K, Kalantidis K. Light intensity affects RNA  
508 silencing of a transgene in *Nicotiana benthamiana* plants. *BMC plant biology*. 2010;10:220.
- 509 18. Chen W, Zhang X, Fan Y, Li B, Ryabov E. A Genetic Network for Systemic RNA Silencing in Plants.  
510 2018;176(4):2700-19.
- 511 19. Palauqui JC, Elmayan T, Pollien JM, Vaucheret H. Systemic acquired silencing: transgene-specific  
512 post-transcriptional silencing is transmitted by grafting from silenced stocks to non-silenced scions.  
513 *The EMBO journal*. 1997;16(15):4738-45.

- 514 20. Voinnet O, Vain P, Angell S, Baulcombe DC. Systemic spread of sequence-specific transgene RNA  
515 degradation in plants is initiated by localized introduction of ectopic promoterless DNA. *Cell*.  
516 1998;95(2):177-87.
- 517 21. Bai S, Kasai A, Yamada K, Li T, Harada T. A mobile signal transported over a long distance induces  
518 systemic transcriptional gene silencing in a grafted partner. *Journal of experimental botany*.  
519 2011;62(13):4561-70.
- 520 22. Molnar A, Melnyk CW, Bassett A, Hardcastle TJ, Dunn R, Baulcombe DC. Small silencing RNAs in  
521 plants are mobile and direct epigenetic modification in recipient cells. *Science (New York, NY)*.  
522 2010;328(5980):872-5.
- 523 23. Mermigka G, Verret F, Kalantidis K. RNA silencing movement in plants. *Journal of integrative plant*  
524 *biology*. 2016;58(4):328-42.
- 525 24. Moissiard G, Parizotto EA, Humber C, Voinnet O. Transitivity in Arabidopsis can be primed, requires  
526 the redundant action of the antiviral Dicer-like 4 and Dicer-like 2, and is compromised by viral-  
527 encoded suppressor proteins. *RNA (New York, NY)*. 2007;13(8):1268-78.
- 528 25. Alder MN, Dames S, Gaudet J, Mango SE. Gene silencing in *Caenorhabditis elegans* by transitive RNA  
529 interference. *RNA (New York, NY)*. 2003;9(1):25-32.
- 530 26. Dadami E, Dalakouras A, Zwiebel M, Krczal G, Wassenegger M. An endogene-resembling transgene  
531 is resistant to DNA methylation and systemic silencing. *RNA biology*. 2014;11(7):934-41.
- 532 27. McHale M, Eamens AL, Finnegan EJ, Waterhouse PM. A 22-nt artificial microRNA mediates  
533 widespread RNA silencing in Arabidopsis. *The Plant journal : for cell and molecular biology*.  
534 2013;76(3):519-29.
- 535 28. Vaistij FE, Jones L, Baulcombe DC. Spreading of RNA targeting and DNA methylation in RNA silencing  
536 requires transcription of the target gene and a putative RNA-dependent RNA polymerase. *The Plant*  
537 *cell*. 2002;14(4):857-67.
- 538 29. Koscianska E, Kalantidis K, Wypijewski K, Sadowski J, Tabler M. Analysis of RNA silencing in  
539 agroinfiltrated leaves of *Nicotiana benthamiana* and *Nicotiana tabacum*. *Plant molecular biology*.  
540 2005;59(4):647-61.
- 541 30. Philips JG, Naim F, Lorenc MT, Dudley KJ, Hellens RP, Waterhouse PM. The widely used *Nicotiana*  
542 *benthamiana* 16c line has an unusual T-DNA integration pattern including a transposon sequence.  
543 2017;12(2):e0171311.
- 544 31. Clemente T. *Nicotiana (Nicotiana tobaccum, Nicotiana benthamiana)*. *Methods in molecular biology*  
545 (Clifton, NJ). 2006;343:143-54.
- 546 32. Bolger AM, Lohse M, Usadel B. Trimmomatic: a flexible trimmer for Illumina sequence data.  
547 *Bioinformatics (Oxford, England)*. 2014;30(15):2114-20.
- 548 33. Li H, Handsaker B, Wysoker A, Fennell T, Ruan J, Homer N, et al. The Sequence Alignment/Map  
549 format and SAMtools. *Bioinformatics (Oxford, England)*. 2009;25(16):2078-9.
- 550 34. Barnett DW, Garrison EK, Quinlan AR, Stromberg MP, Marth GT. BamTools: a C++ API and toolkit for  
551 analyzing and managing BAM files. *Bioinformatics (Oxford, England)*. 2011;27(12):1691-2.
- 552 35. Langmead B, Salzberg SL. Fast gapped-read alignment with Bowtie 2. *Nature methods*.  
553 2012;9(4):357-9.
- 554 36. Bennett M, Deikman J, Hendrix B, Iandolo A. Barriers to Efficient Foliar Uptake of dsRNA and  
555 Molecular Barriers to dsRNA Activity in Plant Cells. *Frontiers in plant science*. 2020;11(816).
- 556 37. Waterhouse PM, Wang M-B, Lough T. Gene silencing as an adaptive defence against viruses. *Nature*.  
557 2001;411(6839):834-42.
- 558 38. Zilberman D, Henikoff S. Silencing of transposons in plant genomes: kick them when they're down.  
559 *Genome Biology*. 2004;5(12):249.

- 560 39. Kalantidis K, Tsagris M, Tabler M. Spontaneous short-range silencing of a GFP transgene in *Nicotiana*  
561 *benthamiana* is possibly mediated by small quantities of siRNA that do not trigger systemic silencing.  
562 *The Plant journal : for cell and molecular biology*. 2006;45(6):1006-16.  
563 40. Smith CJ, Watson CF, Bird CR, Ray J, Schuch W, Grierson D. Expression of a truncated tomato  
564 polygalacturonase gene inhibits expression of the endogenous gene in transgenic plants. *Molecular*  
565 *& general genetics : MGG*. 1990;224(3):477-81.

566

## 567 **Supporting Information Captions**

568 **Fig S1. Background levels of small RNAs mapping to the *GFP* gene in untreated *N. benthamiana*.**

569 Untreated tissue from the first true leaf of each homozygous R2 transgenic events was sampled and the  
570 small RNAs were sequenced. The experiment was arranged as a randomized complete block with 4  
571 replications per treatment. The replicates for each treatment were pooled prior to small RNA sequencing.  
572 The sequencing data are expressed as the sum of small RNA counts 19-25nt in length per  $1 \times 10^6$  total  
573 small RNA reads.

574

575 **Fig S2. T-DNA sequences of the transformation constructs utilized in this study**

576

577 **Fig S3. Primer and probes sequences used for qRT-PCR in this study**

**A**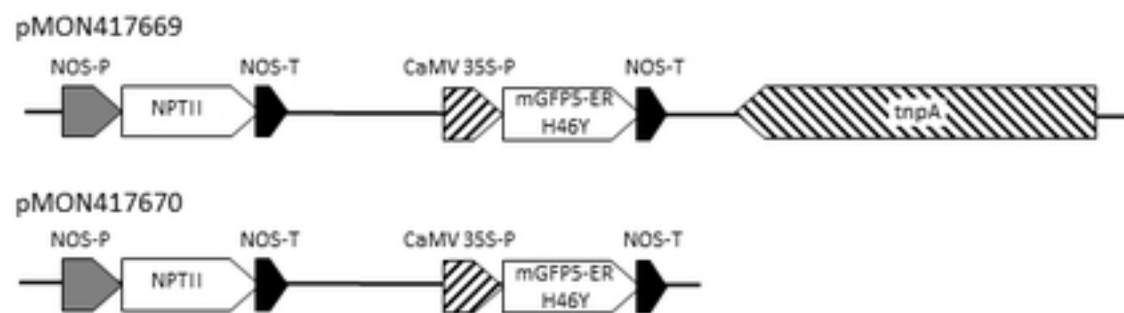**B**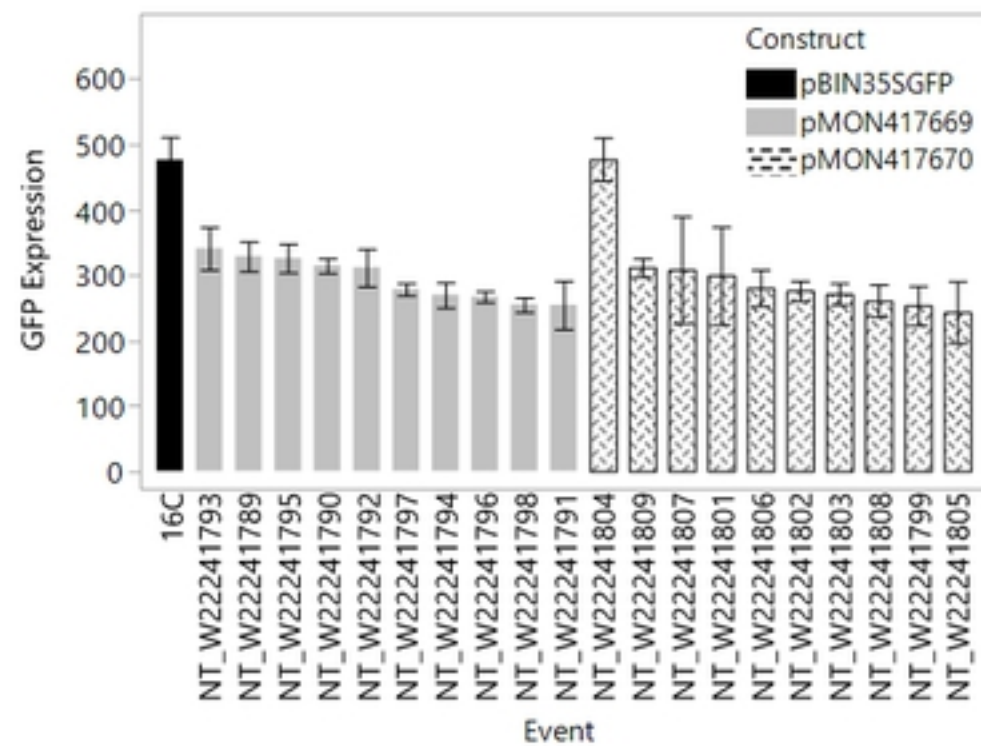



**A**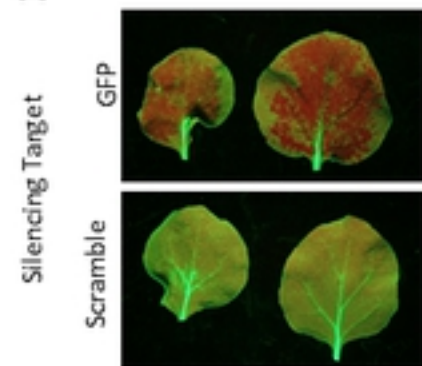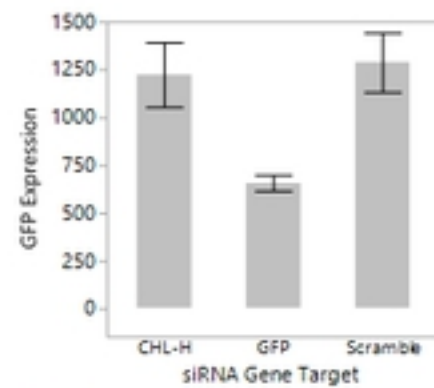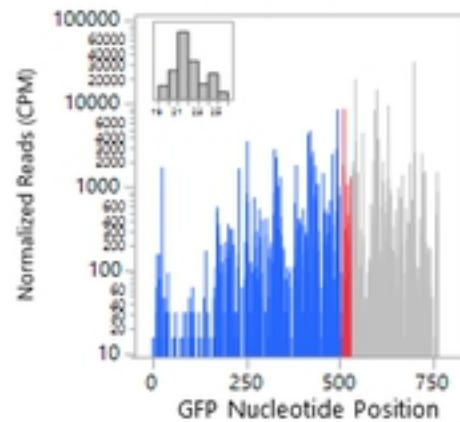**B**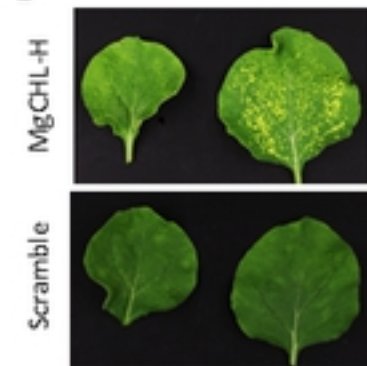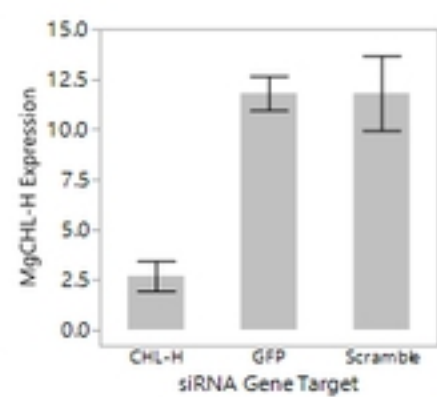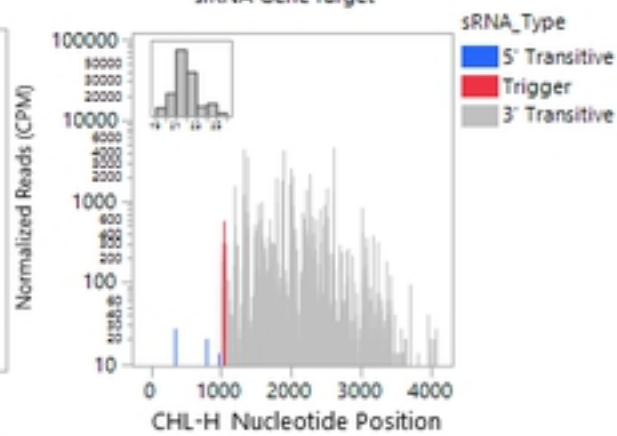

**A**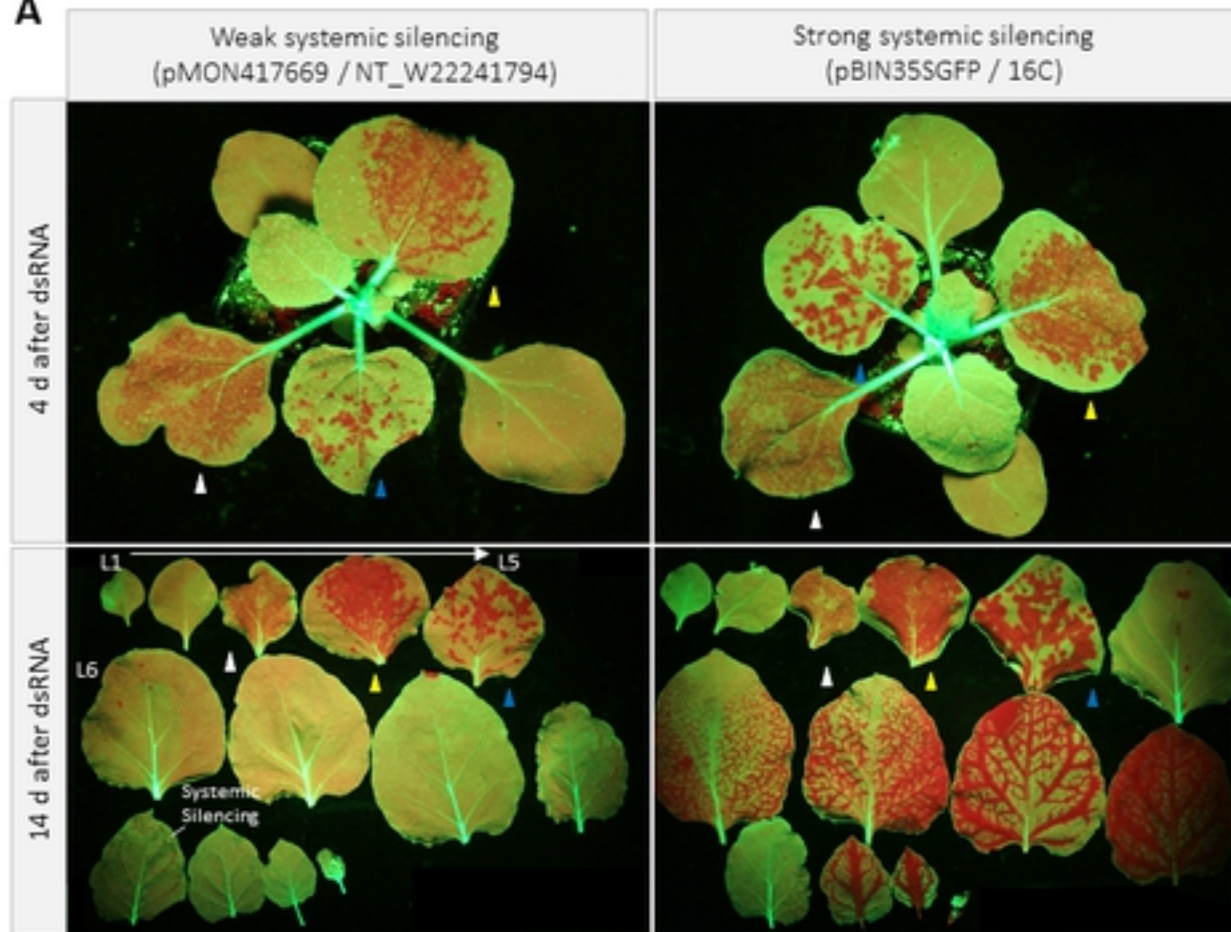**B**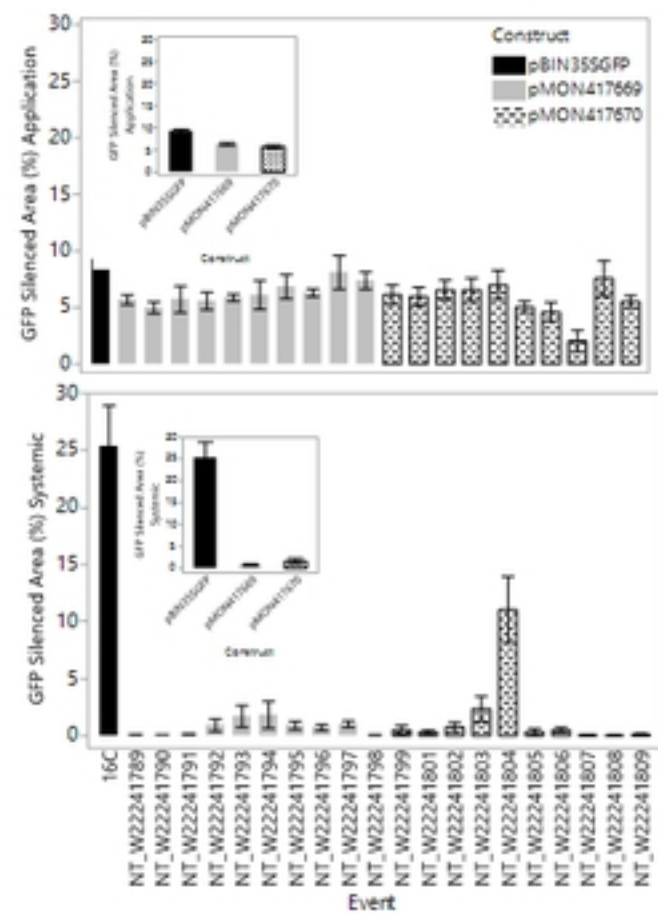

**A**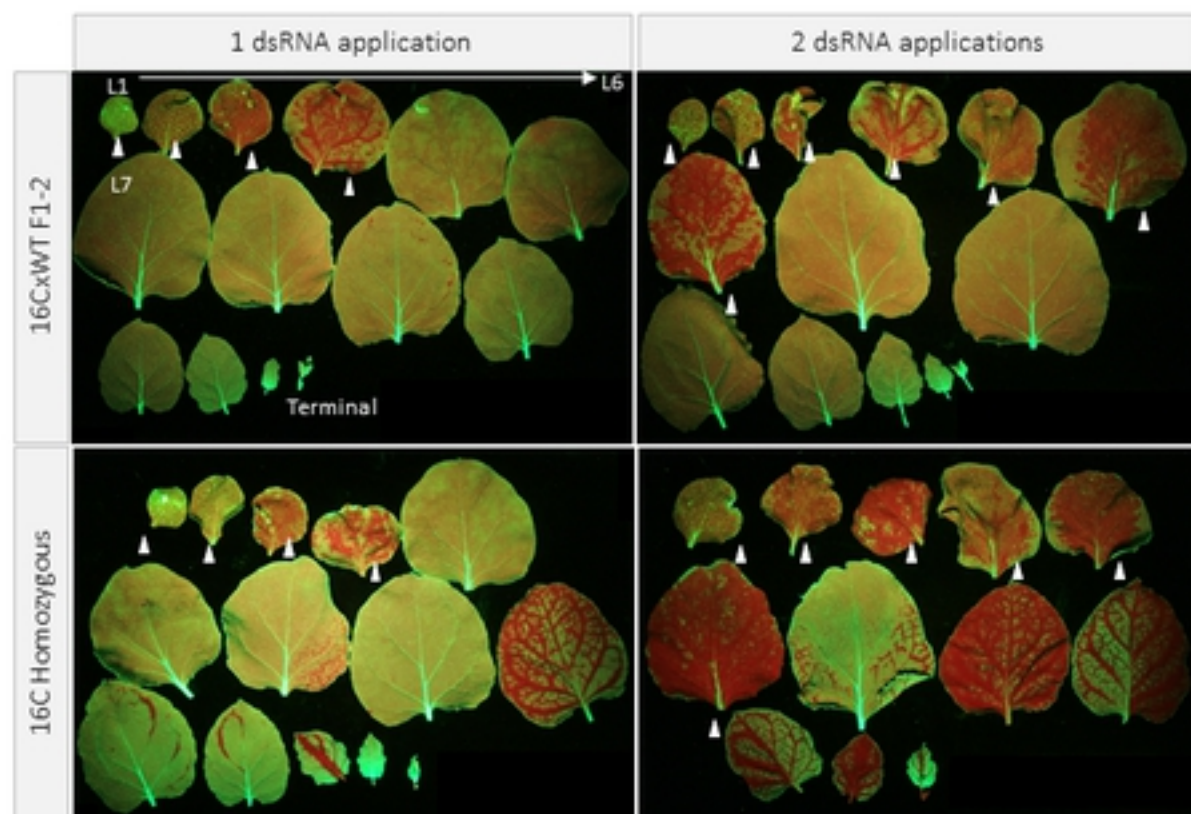**B**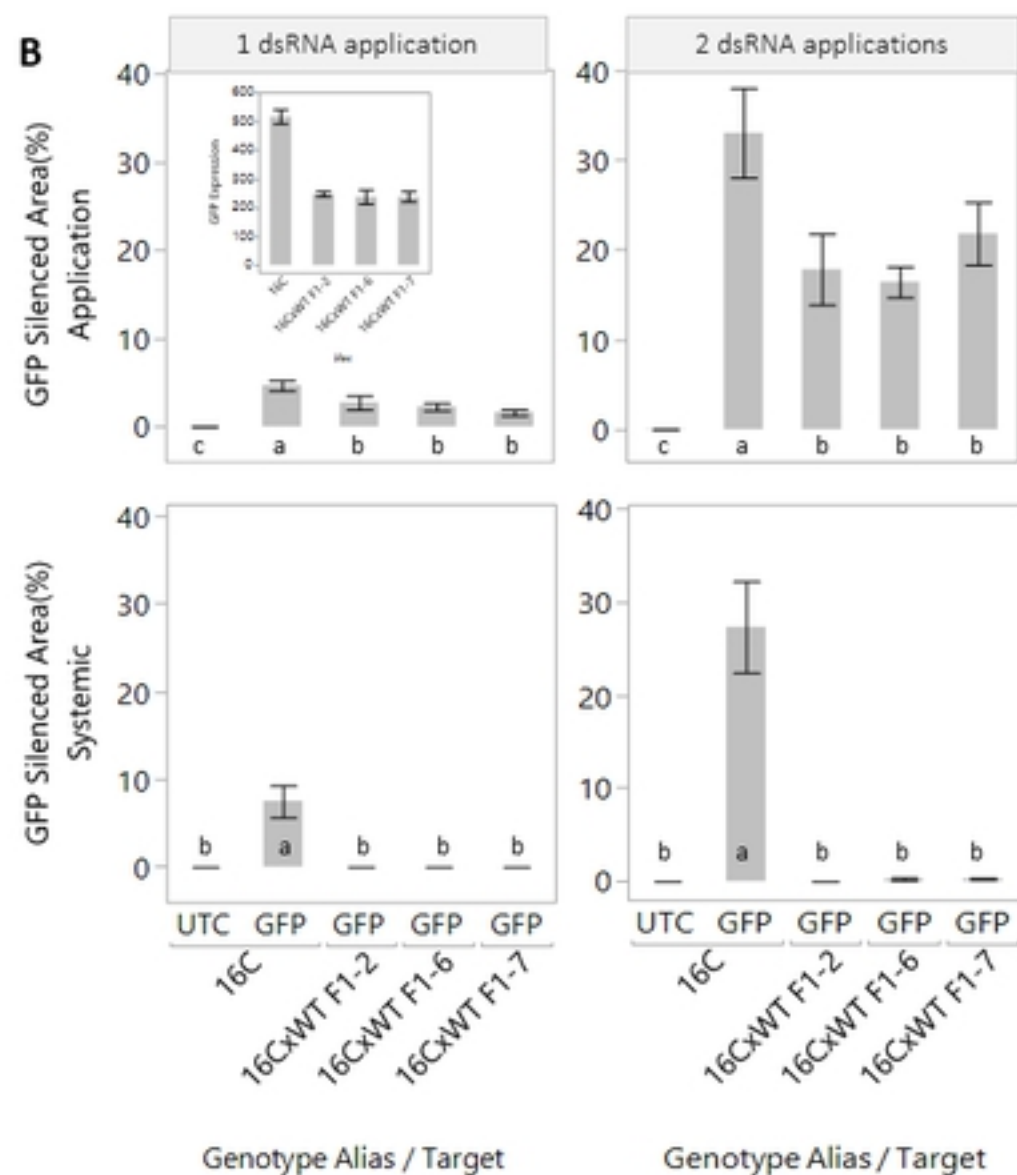

A

| Construct    | Event            | sRNA Type    | Sum of GFP CDS small RNAs 19-25nt |               |
|--------------|------------------|--------------|-----------------------------------|---------------|
|              |                  |              | Application Leaf                  | Systemic Leaf |
| pBIN35SGFP   | 16C              | S Transitive | 230,034                           | 1,228,462     |
|              |                  | T Transitive | 198,808                           | 1,412,981     |
|              | 16C x WT (F1-2)* | S Transitive | 62,557                            | 6,370         |
|              |                  | T Transitive | 91,845                            | 10,704        |
|              | 16C x WT (F1-6)* | S Transitive | 43,002                            | 5,103         |
|              |                  | T Transitive | 60,913                            | 9,530         |
|              | 16C x WT (F1-7)* | S Transitive | 103,119                           | 2,444         |
|              |                  | T Transitive | 175,030                           | 2,646         |
|              | NT_W22241789     | S Transitive | 4,678                             | 1,867         |
|              |                  | T Transitive | 4,636                             | 2,550         |
|              | NT_W22241790     | S Transitive | 11,815                            | 275           |
|              |                  | T Transitive | 11,428                            | 69            |
| NT_W22241791 | S Transitive     | 25,892       | 642                               |               |
|              | T Transitive     | 30,456       | 161                               |               |
| NT_W22241792 | S Transitive     | 6,130        | 373                               |               |
|              | T Transitive     | 5,505        | 16                                |               |
| NT_W22241793 | S Transitive     | 27,110       | 2,169                             |               |
|              | T Transitive     | 27,375       | 639                               |               |
| NT_W22241794 | S Transitive     | 25,790       | 819                               |               |
|              | T Transitive     | 21,220       | 689                               |               |
| NT_W22241795 | S Transitive     | 7,774        | 598                               |               |
|              | T Transitive     | 7,367        | 130                               |               |
| NT_W22241796 | S Transitive     | 31,299       | 239                               |               |
|              | T Transitive     | 43,267       | 24                                |               |
| NT_W22241797 | S Transitive     | 13,013       | 2,709                             |               |
|              | T Transitive     | 15,386       | 2,377                             |               |
| NT_W22241798 | S Transitive     | 25,409       | 1,804                             |               |
|              | T Transitive     | 27,633       | 302                               |               |
| NT_W22241799 | S Transitive     | 3,008        | 218                               |               |
|              | T Transitive     | 3,660        | 40                                |               |
| NT_W22241801 | S Transitive     | 72,888       | 6,795                             |               |
|              | T Transitive     | 76,349       | 9,937                             |               |
| NT_W22241802 | S Transitive     | 22,991       | 1,451                             |               |
|              | T Transitive     | 22,777       | 1,863                             |               |
| NT_W22241803 | S Transitive     | 26,277       | 2,894                             |               |
|              | T Transitive     | 21,809       | 5,240                             |               |
| NT_W22241804 | S Transitive     | 33,694       | 189,995                           |               |
|              | T Transitive     | 25,336       | 284,091                           |               |
| NT_W22241805 | S Transitive     | 23,989       | 371                               |               |
|              | T Transitive     | 23,648       | 40                                |               |
| NT_W22241806 | S Transitive     | 5,030        | 5,337                             |               |
|              | T Transitive     | 5,178        | 832                               |               |
| NT_W22241807 | S Transitive     | 1,721        | 405                               |               |
|              | T Transitive     | 2,988        | 41                                |               |
| NT_W22241808 | S Transitive     | 35,919       | 6,517                             |               |
|              | T Transitive     | 10,307       | 208                               |               |
| NT_W22241809 | S Transitive     | 7,817        | 1,523                             |               |
|              | T Transitive     | 8,861        | 142                               |               |

B

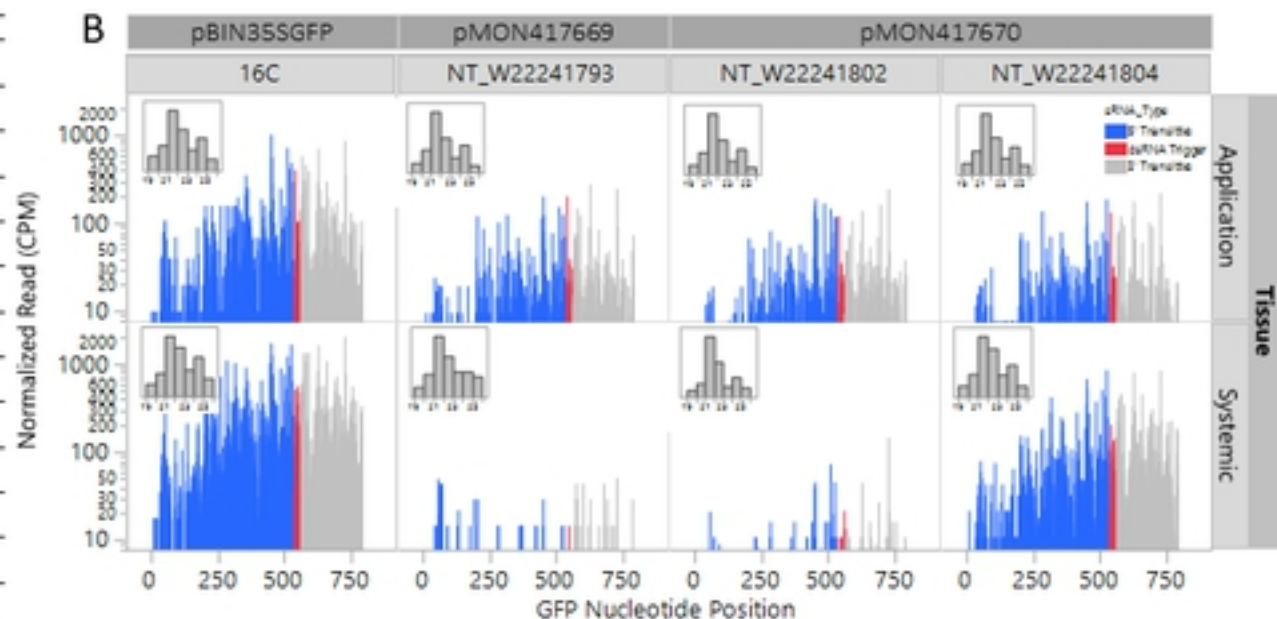

C

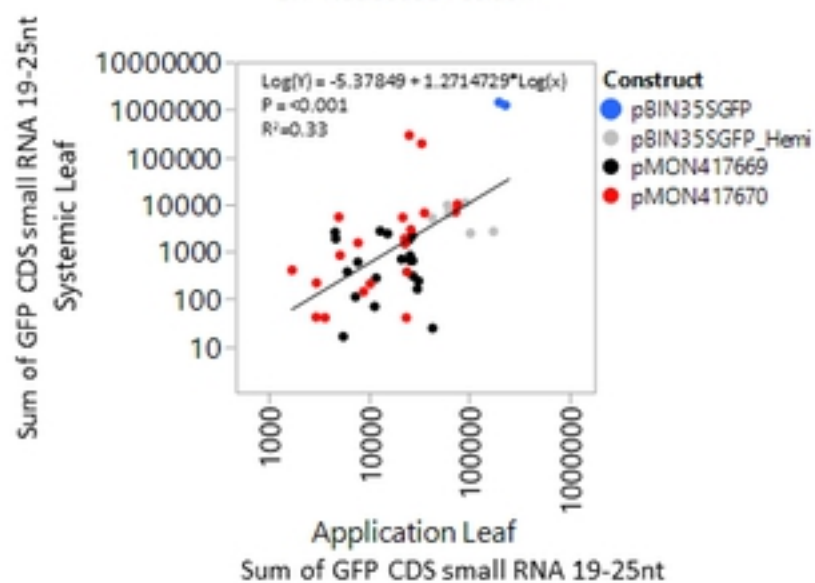

Source: https://www.biorxiv.org/content/10.1101/2021.01.04.425204v1.full.pdf
